# Supplementary material for: Stem-loop structure preference for site-specific RNA editing by APOBEC3A and APOBEC3G
Source: PeerJ. 2017 Dec 6;5:e4136. doi: 10.7717/peerj.4136 (PMC5723131; doi:10.7717/peerj.4136)
Supplement: Table S1 [file peerj-05-4136-s001.xls]

## Sheet: Sheet1
Supplementary Table 1
Oligonucleotides for In vitro RNA editing assay
RNA mutants	Mutations (nts mutated)	Forward primer	Reverse primer	Method of detection	RT-PCR forward primer	RT-PCR reverse primer	Product size (bp)
WT SDHB				AS-RT-QPCR	TTGCCGGCCACAACCCTT	AGCCTTGTCTGGGTCCCATC and AGCCTTGTCTGG GTCCCATCA	1100
SDHB M1 (-1T>C)	T > C (135)	TTGCCATCTAcCGATGGGACC	ATTTCTTGATACGGGGAGC	AS-RT-QPCR	TTGCCGGCCACAACCCTT	AGCCTTGTCTGGGTCCCATC and AGCCTTGTCTGG GTCCCATCA	1100
SDHB M6 (weak stem)	CAT > GTA (129-131)	AGAAATTTGCgtaCTATCGATGGGACCCAGACAAGGC	TGATACGGGGAGCTGTGG	AS-RT-QPCR	TTGCCGGCCACAACCCTT	AGCCTTGTCTGGGTCCCATC and AGCCTTGTCTGG GTCCCATCA	1100
SDHB M7 (disrupt stem)	∆CTACC (128-132 DELETED)	TATCGATGGGACCCAGAC	CAAATTTCTTGATACGGGGAG	AS-RT-QPCR	TTGCCGGCCACAACCCTT	AGCCTTGTCTGGGTCCCATC and AGCCTTGTCTGG GTCCCATCA	1100
WT SDHB		TAATACGACTCACTATAGGGGGTGGGGCTGACGTCAGGA	AGCCTTGTCTGGGTCCCATCGAT	AS-RT-QPCR	TTGCCGGCCACAACCCTT	AGCCTTGTCTGGGTCCCATC and AGCCTTGTCTGG GTCCCATCA	201
SDHB M2 (change C position)	TC >CT (135-136)	TAATACGACTCACTATAGGGGGTGGGGCTGACGTCAGGA	AGCCTTGTCTGGGTCCCATCAGTAGATGGCAA	Sanger sequencing	TAATACGACTCACTATAGGGGGTGGGGCTGACGTCAGGA	AGCCTTGTCTGGGTCCCATC	201
SDHB M3 (penta-loop)	C > T (132)	TAATACGACTCACTATAGGGGGTGGGGCTGACGTCAGGA	AGCCTTGTCTGGGTCCCATCGATAAATGGC	AS-RT-QPCR	TTGCCGGCCACAACCCTT	AGCCTTGTCTGGGTCCCATC and AGCCTTGTCTGG GTCCCATCA	201
SDHB M4 (tri-loop)	∆T (133 DELETED)	TAATACGACTCACTATAGGGGGTGGGGCTGACGTCAGGA	AGCCTTGTCTGGGTCCCATCGATGATGGCAA	AS-RT-QPCR	TTGCCGGCCACAACCCTT	AGCCTTGTCTGGGTCCCATC and AGCCTTGTCTGG GTCCCATCA	201
SDHB M5 (weak stem)	T > C (131)	TAATACGACTCACTATAGGGGGTGGGGCTGACGTCAGGA	AGCCTTGTCTGGGTCCCATCGATAGGTGGCAA	AS-RT-QPCR	TTGCCGGCCACAACCCTT	AGCCTTGTCTGGGTCCCATC and AGCCTTGTCTGG GTCCCATCA	201
SDHB M8 (partially inverted stem)	ATC > GAT (130-132) and GAT >ATC (137-139)	TAATACGACTCACTATAGGGGGTGGGGCTGACGTCAGGA	AGCCTTGTCTGGGTCCCGATGATAATCGGCAAATTTCTTG	Sanger sequencing	TAATACGACTCACTATAGGGGGTGGGGCTGACGTCAGGA	AGCCTTGTCTGGGTCCCGAT	201
SDHB M9 (fully inverted stem)	CCATC <> GGTAG (SWAP) (128-132 and 137-141)	TAATACGACTCACTATAGGGGGTGGGGCTGACGTCAGGA	AGCCTTGTCTGGGTCGATGGGATACCATCCAAATTTCTTGATACG	Sanger sequencing	TAATACGACTCACTATAGGGGGTGGGGCTGACGTCAGGA	AGCCTTGTCTGGGTCGATGG	201
SDHB M10 (inverted stem except 1st bp)	CCAT <> GTAG (SWAP) (128-131 and 138-141)	TAATACGACTCACTATAGGGGGTGGGGCTGACGTCAGGA	AGCCTTGTCTGGGTCGATGCGATAGCATCCAAATTTCTTGATACG	Sanger sequencing	TAATACGACTCACTATAGGGGGTGGGGCTGACGTCAGGA	AGCCTTGTCTGGGTCGATGC	201
WT TMEM 109		TAATACGACTCACTATAGGG ATAGCAGTGGCCTGAGAAAG	CTTCTGTTGGCCTGGTGGTG	Sanger sequencing	TAATACGACTCACTATAGGG ATAGCAGTGGCCTGAGAAAG	CTTCTGTTGGCCTGGTGGTG	186
TMEM 109 M1T	Deletion of A	TAATACGACTCACTATAGGG ATAGCAGTGGCCTGAGAAAG	CTTCTGTTGGCCTGGTGGTGCAAAAGTCCGACGGGACTGGG	Sanger sequencing	TAATACGACTCACTATAGGG ATAGCAGTGGCCTGAGAAAG	CTTCTGTTGGCCTGGTGGTG	186
WT APP		TAATACGACTCACTATAGGGCCTCGTCACGTGTTCAATATGC	ATTCATGCGCTCATAAATCACAC	Sanger sequencing	TAATACGACTCACTATAGGGCCTCGTCACGTGTTCAATATGC	ATTCATGCGCTCATAAATCACAC	188
APP M1A	CC>TC (1545)	TAATACGACTCACTATAGGGCCTCGTCACGTGTTCAATATGC	ATTCATGCGCTCATAAATCACACGAAGGTG	Sanger sequencing	TAATACGACTCACTATAGGGCCTCGTCACGTGTTCAATATGC	ATTCATGCGCTCATAAATCACAC	188
WT PRPSAP2		GATGACATCATTGATGATGTTGACAG	CTTATCGTCGTCATCCTTGTAATC	Sanger sequencing	GATGACATCATTGATGATGTTGACAG	CTTATCGTCGTCATCCTTGTAATC	330
PRPSAP2 M1P (-1C>G)	C>G (663)	CTGACGCCCCgCGGCGGATTG	AAGACAACAAGCCATGAGTTGCCATCAC	Sanger sequencing	GATGACATCATTGATGATGTTGACAG	CTTATCGTCGTCATCCTTGTAATC	330
PRPSAP2 M2P (penta-loop)	C>G (600)	CTTCTGACGCgCCCCGGCGGA	ACAACAAGCCATGAGTTGCCATCACAAAG	Sanger sequencing	GATGACATCATTGATGATGTTGACAG	CTTATCGTCGTCATCCTTGTAATC	330
PRPSAP2 M3P (tri-loop)	∆C (661)	CCCGGCGGATTGAAGAGT	GGCGTCAGAAGACAACAAG	Sanger sequencing	GATGACATCATTGATGATGTTGACAG	CTTATCGTCGTCATCCTTGTAATC	330
PRPSAP2 M4P (no stem-loop)	CGCC>ATAA (657-660)	TGTCTTCTGAataaCCCCGGCGGATTG	ACAAGCCATGAGTTGCCA	Sanger sequencing	GATGACATCATTGATGATGTTGACAG	CTTATCGTCGTCATCCTTGTAATC	330
PRPSAP2 M5P (disrupt stem)	CGC>GCG (657-659)	TGTCTTCTGAgcgCCCCCGGCGG	ACAAGCCATGAGTTGCCA	Sanger sequencing	GATGACATCATTGATGATGTTGACAG	CTTATCGTCGTCATCCTTGTAATC	330
PRPSAP2 M6P (weak stem)	GC>TA (658-659) and GC>UT (667-668)	ccgtaGGATTGAAGAGTCTGCCATTG	gggtaGTCAGAAGACAACAAGCC	Sanger sequencing	GATGACATCATTGATGATGTTGACAG	CTTATCGTCGTCATCCTTGTAATC	330
PRPSAP2 M7P (stem swap, restore stem structure)	GCG>CGC (666-668) (M5P DNA used as template)	AGCGCCCCCGcgcGATTGAAGAG	CAGAAGACAACAAGCCATG	Sanger sequencing	GATGACATCATTGATGATGTTGACAG	CTTATCGTCGTCATCCTTGTAATC	330
