# Supplementary material for: Stem-loop structure preference for site-specific RNA editing by APOBEC3A and APOBEC3G
Source: PeerJ. 2017 Dec 6;5:e4136. doi: 10.7717/peerj.4136 (PMC5723131; doi:10.7717/peerj.4136)
Supplement: Table S2 [file peerj-05-4136-s002.xlsx]

## Sheet: Sheet1
Mutant	ct total SDHB	ct edited SDHB	% RNA editing	Average	Normalization to 100%	Standard Dev.
WT T7R1 NO PR	18.6287	30.1691	0.0003
WT T7R1 NO PR	17.7677	28.4695	0.0006	0.0005	<1%
WT T7R1 NO PR	18.0054	28.5268	0.0007
WT T7R1 +A3A	22.749	23.3785	0.6464
WT T7R1 +A3A	21.6421	21.811	0.8895	0.8247	1
WT T7R1 +A3A	22.0601	22.1519	0.9383
TRILOOP+A3A (M4)	20.7763	21.7348	0.514609
TRILOOP+A3A (M4)	20.911	21.854	0.52016	0.497617	60.3369	3.43505
TRILOOP+A3A (M4)	23.9014	25.0278	0.458082
WT SDHB T7 A3A	22.89	25.39	0.1767
WT SDHB T7 A3A	23.95	25.93	0.2534	0.2399	1
WT SDHB T7 A3A	23.43	25.22	0.2896
SDHB T7M1 A3A (M3)	22.82	28.25	0.0232
SDHB T7M1 A3A (M3)	23.63	29.19	0.0212	0.0242	10.0991	0.3636
SDHB T7M1 A3A (M3)	23.4	28.55	0.0283
SDHB T7M2 A3A (M5)	24.13	28.91	0.0364
SDHB T7M2 A3A (M5)	23.31	27.99	0.039	0.0387	16.1453	0.2184
SDHB T7M2 A3A (M5)	24.16	28.78	0.0407
10 UM A3A WT SDHB	22.6214	23.6992	0.473768	0.470549	1
10 UM A3A WT SDHB	22.4813	23.5788	0.46733
10 UM A3A T135C SDHB (M1)	21.0855	24.6914	0.0821	0.0888	18.8701	0.9421
10 UM A3A T135C SDHB (M1)	22.2989	25.6879	0.0955
10 UM A3A 129-131 SUBS SDHB (M6)	21.6859	25.6385	0.0646	0.0585	12.4375	0.8575
10 UM A3A 129-131 SUBS SDHB (M6)	23.3717	27.6243	0.0525
10 UM A3A 128-132 DEL SDHB (M7)	19.4113	23.6786	0.0519	0.0452	9.6	0.9556
10 UM A3A 128-132 DEL SDHB (M7)	23.6007	28.3028	0.0384
